# Supplementary material
Source: publisher site journal article supplement (https://laamp.iucr.org/__data/assets/pdf_file/0005/152906/LAAAMP-and-CLS-Workshop-Supplementary-Resources_final.pdf)

# Links to Supplementary Resources

## LAAAMP & CLS Teachers’ Workshop 2021

Updated: June 25, 2021

Like any good research journey, there is a lot of reviewing literature along the way! Here you will find a running table of resources we would like to share with you, as some directly relate to our sessions during the workshop week and can help supplement your understanding of the content (you are welcome to share these resources with your students). The resources are listed alphabetically in each table. If you do not find what you are looking for, feel free to reach out to us.

Additionally, if you have a **resource worth sharing**, please send it to the Education Team (email at end)! We encourage the opportunity to collaborate and connect, even beyond the Teachers’ Workshop. This document will be updated after the workshop ends and sent out to you, along with links to our recorded sessions. Don’t forget to check out our [Virtual Classroom](#) as we look to upload new resources there!

### Table of Contents

|                                                          |    |
|----------------------------------------------------------|----|
| Monday Session #1.....                                   | 2  |
| Monday Session #2.....                                   | 3  |
| Tuesday Session #1.....                                  | 4  |
| Tuesday Session #2.....                                  | 5  |
| Wednesday Session #1 .....                               | 6  |
| Wednesday Session #2 .....                               | 6  |
| Thursday Session #1 .....                                | 7  |
| Thursday Session #2 .....                                | 8  |
| Friday Sessions .....                                    | 9  |
| Links/Resources Shared in Chats Throughout the Week..... | 10 |
| Workshop Contact Information .....                       | 11 |

### Engage with CLS

**Social Media**

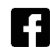

[@EducationCLS](#)

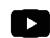

[CLS YouTube Channel](#)

## Monday Session #1 - Introductions

| Title [Format]                                                                                     | Description                                                                                                                                    | Link/Location                                                                                                                                                                       |
|----------------------------------------------------------------------------------------------------|------------------------------------------------------------------------------------------------------------------------------------------------|-------------------------------------------------------------------------------------------------------------------------------------------------------------------------------------|
| <b>The ALBA Synchrotron</b><br>[Video]                                                             | An introductory video explaining the science behind the ALBA synchrotron located near Barcelona, Spain.                                        | <a href="https://www.youtube.com/watch?v=3gW48fRPXIY">https://www.youtube.com/watch?v=3gW48fRPXIY</a>                                                                               |
| <b>The LNLS Synchrotron</b><br>[Video]                                                             | An interview describing the Laboratório Nacional de Luz Síncrotron, a synchrotron located in Sao Paulo, Brazil.                                | <a href="http://www.youtube.com/watch?v=S_ex96fFFss">http://www.youtube.com/watch?v=S_ex96fFFss</a>                                                                                 |
| <b>Le Synchrotron SOLEIL Dessin animé</b><br>[Comic/Educational Resource]                          | A French-language comic outlining how the SOLEIL synchrotron works.                                                                            | <a href="https://bit.ly/3mvx4i7">https://bit.ly/3mvx4i7</a>                                                                                                                         |
| <b>Videos from SOLEIL Synchrotron</b><br>[Videos]                                                  | A collection of videos from the SOLEIL synchrotron providing information on the science and staff of the facility.                             | <a href="https://www.synchrotron-soleil.fr/en/videos">https://www.synchrotron-soleil.fr/en/videos</a>                                                                               |
| <b>Why we let youth play with one of Canada's biggest science facilities Seminar</b> [Video]       | Tracy Walker, the CLS Education Program Lead, leads a discussion about the benefits and reasons of letting youth use the synchrotron facility. | <a href="http://youtu.be/e_jnTQOZPuI">http://youtu.be/e_jnTQOZPuI</a>                                                                                                               |
| <b>Advanced Light Sources and Crystallography: Tools of Discovery and Innovation</b><br>[Web page] | Shared by Sekazi, LAAAMP has an info brochure in various languages that describes light sources and the crystallography technique.             | <a href="https://laaamp.iucr.org/tasks/brochure">https://laaamp.iucr.org/tasks/brochure</a>                                                                                         |
| <b>Welcome from LAAAMP</b><br>[PowerPoint]                                                         | A presentation from LAAAMP to act as an introduction to the workshop and the organization.                                                     | <a href="https://drive.google.com/file/d/1zZITkUwFeajpiB800A_HYtyM3_seiVrW/view?usp=sharing">https://drive.google.com/file/d/1zZITkUwFeajpiB800A_HYtyM3_seiVrW/view?usp=sharing</a> |
| <b>Welcome from the CLS</b> [PowerPoint]                                                           | An introduction to the workshop from the CLS education team.                                                                                   | <a href="https://drive.google.com/file/d/1wdQcgmlSgqtY5EuBNIPy5MukVMSOHIMR/view?usp=sharing">https://drive.google.com/file/d/1wdQcgmlSgqtY5EuBNIPy5MukVMSOHIMR/view?usp=sharing</a> |

## Monday Session #2 – Weaving Ways of Knowing

| Title [Format]                                                              | Description                                                                                                                               | Link/Location                                                                                                                                                                                                                                                                                                                                                                                                                                                                                        |
|-----------------------------------------------------------------------------|-------------------------------------------------------------------------------------------------------------------------------------------|------------------------------------------------------------------------------------------------------------------------------------------------------------------------------------------------------------------------------------------------------------------------------------------------------------------------------------------------------------------------------------------------------------------------------------------------------------------------------------------------------|
| <b>Etuaptomuk: Two-Eyed Seeing   Rebecca Thomas Presentation</b><br>[Video] | A TEDx Talk which describes ‘Two-eyed seeing’, a method to bring together western and Indigenous thinking.                                | <a href="http://www.youtube.com/watch?v=bA9EwcFbVfg">http://www.youtube.com/watch?v=bA9EwcFbVfg</a>                                                                                                                                                                                                                                                                                                                                                                                                  |
| <b>Indigenous Connections</b> [Web page]                                    | A collection of Indigenous resources and content from the CLS Education team.                                                             | <a href="https://sites.google.com/lightsource.ca/virtualclassroom/indigenous-connections">https://sites.google.com/lightsource.ca/virtualclassroom/indigenous-connections</a>                                                                                                                                                                                                                                                                                                                        |
| <b>Panelist Corey Gray</b> [Web Page]                                       | (1) Bio on California State University web site.<br><br>(2) News article featuring gravitational waves and Blackfoot language connections | (1) <a href="https://www2.calstate.edu/impact-of-the-csu/alumni/made-in-the-csu/humboldt/Pages/corey-gray.aspx">https://www2.calstate.edu/impact-of-the-csu/alumni/made-in-the-csu/humboldt/Pages/corey-gray.aspx</a><br><br>(2) <a href="https://woc.aises.org/content/corey-gray-siksika-nation-blackfoot-laser-interferometer-gravitational-wave-observatory-ligo">https://woc.aises.org/content/corey-gray-siksika-nation-blackfoot-laser-interferometer-gravitational-wave-observatory-ligo</a> |
| <b>Panelist Janice Osecap</b> [web page]                                    | University news article on success of STEM accelerator program for Indigenous students                                                    | <a href="https://news.usask.ca/articles/colleges/2021/the-environment-is-supportive-and-constant-usask-students-praise-isap,-stem-accelerator-courses.php">https://news.usask.ca/articles/colleges/2021/the-environment-is-supportive-and-constant-usask-students-praise-isap,-stem-accelerator-courses.php</a>                                                                                                                                                                                      |
| <b>Panelist Julia Doucette-Garr</b><br>[web page]                           | University news article on Mentor STEP for Indigenous women in science.                                                                   | <a href="https://news.usask.ca/articles/research/2020/a-world-of-difference-shining-a-light-on-indigenous-women-in-science.php">https://news.usask.ca/articles/research/2020/a-world-of-difference-shining-a-light-on-indigenous-women-in-science.php</a>                                                                                                                                                                                                                                            |
| <b>CLS Summer Students</b><br>[Newsletter Article]                          | An article highlighting the work of two of our Indigenous summer students at the CLS.                                                     | <a href="https://sites.google.com/lightsource.ca/virtualclassroom/about/whats-happening">https://sites.google.com/lightsource.ca/virtualclassroom/about/whats-happening</a>                                                                                                                                                                                                                                                                                                                          |

## Tuesday Session #1 – Virtual Tour

| Title [Format]                                                                                    | Description                                                                                                                                                                              | Link/Location                                                                                                                                                                                                       |
|---------------------------------------------------------------------------------------------------|------------------------------------------------------------------------------------------------------------------------------------------------------------------------------------------|---------------------------------------------------------------------------------------------------------------------------------------------------------------------------------------------------------------------|
| <b>Introduction to the Canadian Light Source STEM Seminar with Robert Blyth</b><br>[Video]        | In this seminar, Dr. Robert Blyth provides an overview of what the synchrotron is, an in-depth tour of the inside of the building, and how light is used to conduct research at the CLS. | <a href="https://www.youtube.com/watch?v=0eqfDJDcIn4">https://www.youtube.com/watch?v=0eqfDJDcIn4</a>                                                                                                               |
| <b>Supporting Excellence in Research at the Canadian Light Source Synchrotron Webinar</b> [Video] | A webinar featuring CLS Science Director Dr. Gianluigi Botton who highlights the research, beamline capabilities and outcomes of the CLS.                                                | <a href="https://www.youtube.com/watch?v=mjNpKTN2CjI">https://www.youtube.com/watch?v=mjNpKTN2CjI</a>                                                                                                               |
| <b>Synchrotron Explained</b> [Web page]                                                           | An interactive exploration of the CLS facility with a collection of resources, videos, and lessons.                                                                                      | <a href="https://sites.google.com/lightsource.ca/virtualclassroom/student-exploration/synchrotron-explained">https://sites.google.com/lightsource.ca/virtualclassroom/student-exploration/synchrotron-explained</a> |
| <b>CLS Virtual Tour</b><br>[Interactive Tour]                                                     | A virtual tour of the CLS facility including information on CLS science, mechanical equipment, and fun facts!                                                                            | <a href="https://www.lightsource.ca/tours">https://www.lightsource.ca/tours</a>                                                                                                                                     |

## Tuesday Session #2 – Connections to Physics

| Title [Format]                                                              | Description                                                                                                                                              | Link/Location                                                                                                     |
|-----------------------------------------------------------------------------|----------------------------------------------------------------------------------------------------------------------------------------------------------|-------------------------------------------------------------------------------------------------------------------|
| <b>A Cyclotron Is...</b><br>[Comic/Educational Resource]                    | A comic providing different perspectives on what a cyclotron is.                                                                                         | <a href="https://bit.ly/37roxbu">https://bit.ly/37roxbu</a>                                                       |
| <b>The Electromagnetic Spectrum (From a Teacher Perspective)</b><br>[Video] | A teacher's perspective of the electromagnetic spectrum and how it is used at the CLS, as well as how teachers can incorporate it into their classrooms. | <a href="https://www.youtube.com/watch?v=1m7g-Ny5wtA">https://www.youtube.com/watch?v=1m7g-Ny5wtA</a>             |
| <b>How Does It All Work?</b> [Slideshow]                                    | A summary of the IDEAS Beamline at the CLS detailing the components and the processes used by the beamline scientists.                                   | <a href="https://bit.ly/35fprW8">https://bit.ly/35fprW8</a>                                                       |
| <b>How a Synchrotron Works</b> [Video]                                      | A short video describing how a synchrotron works.                                                                                                        | <a href="https://www.youtube.com/watch?v=nuJnJqq9LXM">https://www.youtube.com/watch?v=nuJnJqq9LXM</a>             |
| <b>Inside the Synchrotron</b> [Web page]                                    | A more detailed look at the components of the synchrotron and the science behind each of those parts.                                                    | <a href="https://www.lightsource.ca/inside_the_synchrotron">https://www.lightsource.ca/inside_the_synchrotron</a> |
| <b>CLS Machine Information</b> [Web page]                                   | The various synchrotron machine parameters of the CLS.                                                                                                   | <a href="https://www.lightsource.ca/machine.html">https://www.lightsource.ca/machine.html</a>                     |
| <b>Science with a Synchrotron</b><br>[Slideshow]                            | A student-created resource which outlines how a synchrotron works, why its used, and connections to various physics concepts!                            | <a href="https://bit.ly/3fVqj8O">https://bit.ly/3fVqj8O</a>                                                       |

**List of Classroom Resources & Activities**

Check out our collection of lesson plans, activities, and resources that are based around the CLS, synchrotron science, and synchrotron research!

- <https://sites.google.com/lightsource.ca/virtualclassroom-for-educators/educational-resources>

## Wednesday Session #1 – IDEAS Beamline

| Title [Format]                                          | Description                                                                                                 | Link/Location                                                                                                                                                                       |
|---------------------------------------------------------|-------------------------------------------------------------------------------------------------------------|-------------------------------------------------------------------------------------------------------------------------------------------------------------------------------------|
| <b>IDEAS Beamline Tour</b> [Video]                      | A guided tour of the optical and experimental enclosures of the IDEAS beamline at the CLS.                  | <a href="http://www.youtube.com/watch?v=AHvIH6i9ou0&amp;t">http://www.youtube.com/watch?v=AHvIH6i9ou0&amp;t</a>                                                                     |
| <b>IDEAS XRF Summary Sheet</b> [Educational Resource]   | A quick cheat sheet that lists the common heavy metal elements present in samples. .                        | <a href="https://bit.ly/3o7djiB">https://bit.ly/3o7djiB</a>                                                                                                                         |
| <b>Laboratory Notebook Guide</b> [Educational Resource] | Learn what goes into a lab notebook or log book, how to organize it, and what best practices are.           | <a href="https://bit.ly/35h3SV8">https://bit.ly/35h3SV8</a>                                                                                                                         |
| <b>Soil Learning Module</b> [Unit Plan]                 | A learning module for the CLS Education TREE Program focusing on soil, soil horizons, and the nutrient web. | <a href="https://confluence.lightsource.ca/display/TTP/Module+3+-+Soil">https://confluence.lightsource.ca/display/TTP/Module+3+-+Soil</a>                                           |
| <b>XRF Animated with the IDEAS Beamline</b> [Slideshow] | Look at the process of XRF in this animation slides. Feel free to download these slides and present them.   | <a href="https://drive.google.com/file/d/1yaOW6kRyZZTMOB2bVeyjfhrKu7-6M5Tb/view?usp=sharing">https://drive.google.com/file/d/1yaOW6kRyZZTMOB2bVeyjfhrKu7-6M5Tb/view?usp=sharing</a> |

## Wednesday Session #2 – Understanding Data

| Title [Format]                                                              | Description                                                                                                                  | Link/Location                                                                                                                                                     |
|-----------------------------------------------------------------------------|------------------------------------------------------------------------------------------------------------------------------|-------------------------------------------------------------------------------------------------------------------------------------------------------------------|
| <b>Excelling, With Synchrotron Data</b> [Video]                             | An informational video providing some tips and tricks for getting data into spreadsheets.                                    | <a href="https://www.youtube.com/watch?v=hVvBFGHIU30">https://www.youtube.com/watch?v=hVvBFGHIU30</a>                                                             |
| <b>Plotting Data with Excel</b> [Video playlist]                            | A series of CLS-made videos detailing how to plot and manipulate data in Excel.                                              | <a href="https://www.youtube.com/playlist?list=P Lj5uIatsoSLdR_9C_ZU4DQeoPGUvvlGxE">https://www.youtube.com/playlist?list=P Lj5uIatsoSLdR_9C_ZU4DQeoPGUvvlGxE</a> |
| <b>X-rays and Soil Science STEM Seminar with Dr. Adam Gillespie</b> [Video] | A STEM seminar from Dr. Adam Gillespie focusing on his research on soil and how synchrotrons can provide useful information. | <a href="https://www.youtube.com/watch?v=H8unGXuI9DA">https://www.youtube.com/watch?v=H8unGXuI9DA</a>                                                             |

## Thursday Session #1 – Research Story

| Title [Format]                                                   | Description                                                                                                                                                                 | Link/Location                                                                                                                                                                                                              |
|------------------------------------------------------------------|-----------------------------------------------------------------------------------------------------------------------------------------------------------------------------|----------------------------------------------------------------------------------------------------------------------------------------------------------------------------------------------------------------------------|
| <b>Animation of Crystallography Experimental Data</b> [Video]    | An animation of data collected from a thaumatin sample collected in the CMCF beamline at the CLS.                                                                           | <a href="http://youtu.be/XvkrkWkd6XI">http://youtu.be/XvkrkWkd6XI</a>                                                                                                                                                      |
| <b>What is Crystallography and the CMCF Beamline?</b> [Web page] | A link to the Canadian Macromolecular Crystallography Facility (CMCF) website which provides an overview of crystallography and the facility itself.                        | <a href="https://cmcf.lightsource.ca/about-cmcf/">https://cmcf.lightsource.ca/about-cmcf/</a>                                                                                                                              |
| <b>10 Years of Discovery with Michel Fodje</b> [Video]           | Michel Fodje, Staff Scientist at the CMCF, highlights the importance of using the synchrotron to find out the structure of disease, virus, and the building blocks of life. | <a href="https://www.youtube.com/watch?v=Ir_Yj4PameM">https://www.youtube.com/watch?v=Ir_Yj4PameM</a>                                                                                                                      |
| <b>DNA Animations</b> [Video]                                    | A collection of animations of DNA for a science & art exhibition.                                                                                                           | <a href="https://www.youtube.com/watch?v=7Hk9jct2ozY">https://www.youtube.com/watch?v=7Hk9jct2ozY</a>                                                                                                                      |
| <b>Animation of Electron Transport Chain</b> [Video]             | An excerpt from a HarvardX cell biology course containing animations of electron transport chains and mitochondrial diseases.                                               | <a href="https://www.youtube.com/watch?v=LQmTKxI4Wn4">https://www.youtube.com/watch?v=LQmTKxI4Wn4</a>                                                                                                                      |
| <b>What is a Protein?</b> [Video]                                | An informative animation and overview of proteins, amino acids, and data representation created by the RCSB Protein Data Bank.                                              | <a href="https://www.youtube.com/watch?v=wwTv8TqWC48">https://www.youtube.com/watch?v=wwTv8TqWC48</a><br>Spanish:<br><a href="https://www.youtube.com/watch?v=wZVWnHOVPuw">https://www.youtube.com/watch?v=wZVWnHOVPuw</a> |

## Thursday Session #2 – Curricular Connections

| Title [Format]                                 | Description                                                                                                                                                                                                                    | Link/Location                                                                                                                                                                                                 |
|------------------------------------------------|--------------------------------------------------------------------------------------------------------------------------------------------------------------------------------------------------------------------------------|---------------------------------------------------------------------------------------------------------------------------------------------------------------------------------------------------------------|
| <b>CLS News</b> [Web page]                     | A database of CLS research-related news that shows what is happening in science today.                                                                                                                                         | <a href="https://www.lightsource.ca/news.html">https://www.lightsource.ca/news.html</a>                                                                                                                       |
| <b>CMCF Research Highlights</b> [Web page]     | A compilation of CLS research highlights from the CMCF.                                                                                                                                                                        | <a href="https://cmcf.lightsource.ca/news/category/research-highlights/">https://cmcf.lightsource.ca/news/category/research-highlights/</a>                                                                   |
| <u><a href="#">CLS Education Resources</a></u> |                                                                                                                                                                                                                                |                                                                                                                                                                                                               |
| <b>Accelerating Matter</b>                     | This activity uses magnetic force to accelerate a ball bearing. It parallels can be drawn to CLS to help demonstrate similar concepts.                                                                                         | <a href="https://bit.ly/3kileHh">https://bit.ly/3kileHh</a>                                                                                                                                                   |
| <b>Building a Monochromator</b>                | A monochromator is the device that enables scientists to select specific wavelengths of light for their experiments. Using a prism, students will explore the properties of light and the spectrum within a practical context. | <a href="https://bit.ly/34dKnNU">https://bit.ly/34dKnNU</a>                                                                                                                                                   |
| <b>Light and Optics Lesson</b>                 | Done from Kindergarten to Grade 12! The lesson demonstrates diffraction, scattering, reflection, and photoluminescence with a tub of water and lasers.                                                                         | English:<br><a href="https://bit.ly/37suo0u">https://bit.ly/37suo0u</a><br>French:<br><a href="https://bit.ly/34fbQOZ">https://bit.ly/34fbQOZ</a>                                                             |
| <b>Location Discussion</b>                     | The premise of this lesson is based on decision making. Students must determine if the location of building a synchrotron is appropriate.                                                                                      | <a href="https://bit.ly/3m7AUh0">https://bit.ly/3m7AUh0</a>                                                                                                                                                   |
| <b>Making a Scientific Poster Resources</b>    | Part of any researcher's journey is sharing their experience and their findings to the scientific community.                                                                                                                   | <a href="https://sites.google.com/lightsource.ca/virtualclassroom/student-exploration/scientific-posters">https://sites.google.com/lightsource.ca/virtualclassroom/student-exploration/scientific-posters</a> |
| <b>Research Proposal</b>                       | In this resource, students are encouraged to write their own research proposal based on a topic of their choosing. This will get them thinking about what is all involved.                                                     | <a href="https://bit.ly/34gDIT9">https://bit.ly/34gDIT9</a>                                                                                                                                                   |
| <b>Women in Science Videos</b>                 | This resource is a collection of CLS YouTube videos that capture some of the many inspiring women who have passed through our doors.                                                                                           | <a href="https://www.youtube.com/playlist?list=PLj5uIatsoSLdEZBf4Qz1r-a8B7S98a_L6">https://www.youtube.com/playlist?list=PLj5uIatsoSLdEZBf4Qz1r-a8B7S98a_L6</a>                                               |



## Friday Session – Approaches & Strategies

| Title [Format]                                      | Description                                                                                                                                               | Link/Location                                                                                                                                                                       |
|-----------------------------------------------------|-----------------------------------------------------------------------------------------------------------------------------------------------------------|-------------------------------------------------------------------------------------------------------------------------------------------------------------------------------------|
| <b>CLS Education Program Info</b><br>[Web pages]    | Web pages on the main CLS website that go over the various Education programs and how you can get involved.                                               | <a href="https://www.lightsource.ca/education.html">https://www.lightsource.ca/education.html</a>                                                                                   |
| <b>CLS Education Virtual Classroom</b><br>[Website] | A web page developed by the CLS Education team as an accessible learning platform for students and teachers to interact with from anywhere on the planet. | <a href="https://sites.google.com/lightsource.ca/virtualclassroom/home">https://sites.google.com/lightsource.ca/virtualclassroom/home</a>                                           |
| <b>CLS YouTube Channel</b> [Web page]               | The official CLS YouTube account with a wide range of playlists, resources, and research information in video form.                                       | <a href="https://www.youtube.com/user/CanadianLightSource">https://www.youtube.com/user/CanadianLightSource</a>                                                                     |
| <b>CLS Education Programs</b><br>[PowerPoint]       | A PowerPoint that goes over the process of using research in science education and provides an overview of the programs the education team offers.        | <a href="https://drive.google.com/file/d/1UqyGyXx-zFvV8r6wyMPxTQjQbBdBRFOn/view?usp=sharing">https://drive.google.com/file/d/1UqyGyXx-zFvV8r6wyMPxTQjQbBdBRFOn/view?usp=sharing</a> |

## Links/Resources Shared in Chats Throughout the Week

This section will contain any useful links that have been shared during the sessions by fellow participants. We encourage you to share one yourself! This section will be updated as the workshop progresses and sent to you after the workshop closes.

| Topic                     | Summary of Resource                                                                                                                                                                                     | Link/Resource                                                                                                                                                                       |
|---------------------------|---------------------------------------------------------------------------------------------------------------------------------------------------------------------------------------------------------|-------------------------------------------------------------------------------------------------------------------------------------------------------------------------------------|
| Synchrotron & Plant-life  | Dr. Chithra Karunakaran, one of the researchers and a science manager at the CLS, delivers a presentation on the developments in plant imaging and her studies into drought tolerances and plant waxes. | <a href="https://www.youtube.com/watch?v=EN2qtK9LBr4">https://www.youtube.com/watch?v=EN2qtK9LBr4</a>                                                                               |
| Synchrotron & Agriculture | A presentation from Dr. Chithra Karunakaran from a previous workshop focusing on connecting synchrotron and agricultural research.                                                                      | <a href="https://drive.google.com/file/d/13YKCNjvPJZoBcRdDHNlsZSTOgHZZRbCa/view?usp=sharing">https://drive.google.com/file/d/13YKCNjvPJZoBcRdDHNlsZSTOgHZZRbCa/view?usp=sharing</a> |
| CLS & Cancer Research     | A compilation of research stories from the CLS related to cancer research.                                                                                                                              | <a href="https://www.lightsource.ca/news.html?tag=9">https://www.lightsource.ca/news.html?tag=9</a>                                                                                 |
| CLS & Cancer Research     | A science poster outlining the cancer research performed at the CLS.                                                                                                                                    | <a href="https://www.lightsource.ca/ckfinder/userfiles/files/2020cancer.pdf">https://www.lightsource.ca/ckfinder/userfiles/files/2020cancer.pdf</a>                                 |
| Global Synchrotrons       | The homepage for ALBA synchrotron, located near Barcelona, Spain.                                                                                                                                       | <a href="https://www.cells.es/">https://www.cells.es/</a>                                                                                                                           |
| Science on Stage          | A network for STEM teachers to exchange ideas and support one another in professional development and growth.                                                                                           | <a href="https://www.science-on-stage.eu/">https://www.science-on-stage.eu/</a>                                                                                                     |
| Science in School         | A website which compiles stories and resources related to teaching STEM in classrooms.                                                                                                                  | <a href="https://www.scienceinschool.org/">https://www.scienceinschool.org/</a>                                                                                                     |

## Workshop Contact Information

| Name                      | Country                | Email                                                                                  |
|---------------------------|------------------------|----------------------------------------------------------------------------------------|
| Alfredo Romero Contretas  | Mexico                 |                                                                                        |
| Ayşe Nur Çelikkol         | Turkey                 | <a href="mailto:ayse.celikkol@hisarschool.k12.tr">ayse.celikkol@hisarschool.k12.tr</a> |
| Filio Orfanou Constanidou | Cyprus                 | <a href="mailto:filio.orfanou@hotmail.com">filio.orfanou@hotmail.com</a>               |
| Josefina Robles           | Mexico                 | <a href="mailto:josefina.robles@correo.buap.mx">josefina.robles@correo.buap.mx</a>     |
| Keyla Soto Hidalgo        | Puerto Rico            | <a href="mailto:keyla.soto@upr.edu">keyla.soto@upr.edu</a>                             |
| Samuel Tejada             | Mexico                 | <a href="mailto:samuel.tejada@inin.gob.mx">samuel.tejada@inin.gob.mx</a>               |
|                           |                        |                                                                                        |
| Sekazi Mtingwa            | LAAAMP (United States) | <a href="mailto:sekazi.mtingwa@gmail.com">sekazi.mtingwa@gmail.com</a>                 |
| Amanda Pfeiffer           | CLS (Canada)           | <a href="mailto:Amanda.pfeiffer@lightsource.ca">Amanda.pfeiffer@lightsource.ca</a>     |
| Tracy Walker              | CLS (Canada)           | <a href="mailto:Tracy.walker@lightsource.ca">Tracy.walker@lightsource.ca</a>           |
| Noah Dick                 | CLS (Canada)           | <a href="mailto:Noah.dick@lightsource.ca">Noah.dick@lightsource.ca</a>                 |
| Janice Osecap             | CLS (Canada)           | <a href="mailto:Janice.osecap@lightsource.ca">Janice.osecap@lightsource.ca</a>         |

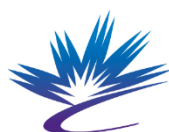

Canadian Light Source  
Centre canadien de rayonnement synchrotron

### CLS Education Team

[education@lightsource.ca](mailto:education@lightsource.ca)

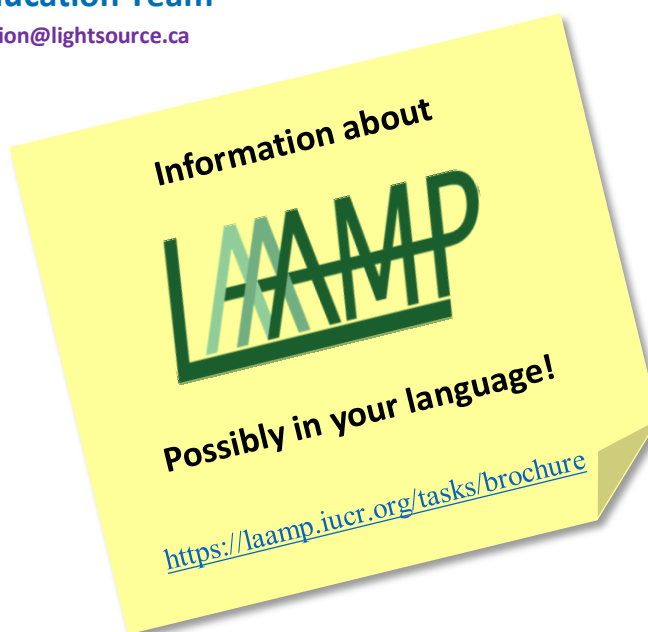

Supplement: Supplementary file 1 [file LAAAMP-and-CLS-Workshop-Supplementary-Resources_final.pdf]
